# Supplementary material for: Investigation and identification of functional post-translational modification sites associated with drug binding and protein-protein interactions
Source: Springer Nature journal article supplement (doi:10.1186/s12918-017-0506-1), 2017-12-01
Supplement: MOESM1 [file 12918_2017_506_MOESM1_ESM.pdf]

**Table S1. Classification and definition of drugs.**

|                         | Small molecules                   | Biologics (Big molecules)                                                   |                  |
|-------------------------|-----------------------------------|-----------------------------------------------------------------------------|------------------|
|                         |                                   | Small biologics                                                             | Biologics        |
| <b>Atomic size</b>      | 20-100 atoms                      | 200-3000 atoms                                                              | 500-50,000 atoms |
| <b>Molecular weight</b> | < 900 Dalton                      | Thousand to hundred thousand Dalton                                         |                  |
| <b>Example</b>          | Aspirin                           | Hormones, Cytokines                                                         | EPO, Avastin     |
| <b>Usage</b>            | Multiple, Mainly oral             | Injection                                                                   |                  |
| <b>Production</b>       | Natural extraction &<br>Synthetic | Produced by recombinant DNA or Cell culture (E.coli, Yeast, Mammal cell...) |                  |
